# Supplementary material for: Longitudinal Circulating Tumor DNA Profiling in Metastatic Colorectal Cancer During Anti-EGFR Therapy
Source: PubMed Central journal article supplement (PMC8908369; doi:10.3389/fonc.2022.830816), 2022-02-24
Supplement: DataSheet_1.pdf [file DataSheet_1.pdf]

## Supplementary Material

### Supplementary Figures and Tables

#### 1.1 Supplementary Figures

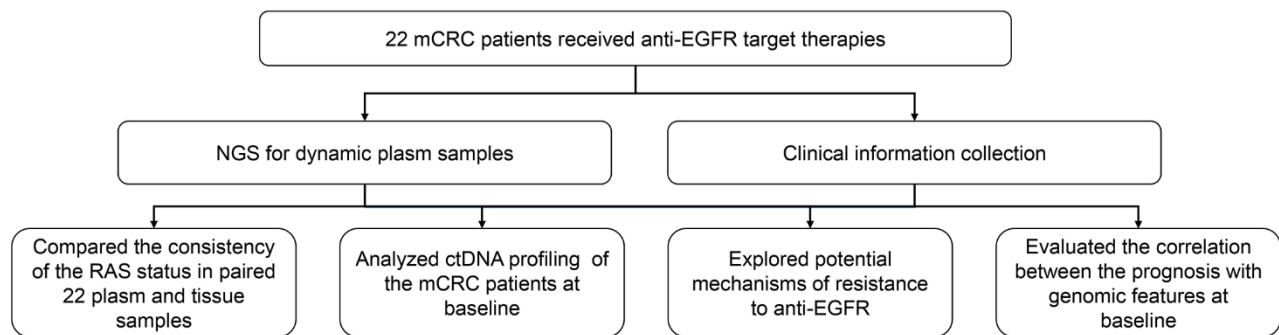

**Supplementary Figure 1.** An overview of the workflow in this study.

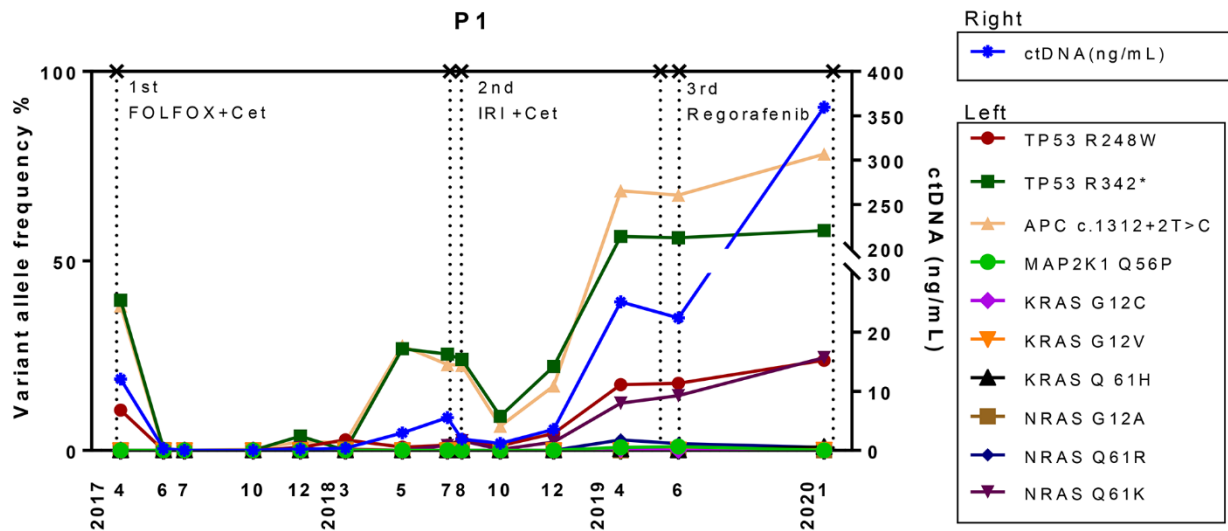

**Supplementary Figure 2.** Clinical utility of longitudinal ctDNA testing in patient 1 (P1).  $ctDNA (ng/mL) = VAF_{max} * m(ctDNA) / Volume$

## 1.2 Supplementary Tables

**Table S1.** The list of 61 cancer-related genes.

|         |        |       |       |         |        |        |       |       |        |
|---------|--------|-------|-------|---------|--------|--------|-------|-------|--------|
| AKT1    | ALK    | AR    | ARAF  | BCL2L11 | BRAF   | BRCA1  | BRCA2 | CDK4  | CDKN2A |
| CYP2C19 | CYP2D6 | DPYD  | EGFR  | ERBB2   | ERBB3  | ESR1   | FGFR1 | FGFR2 | FGFR3  |
| GNA11   | GNAQ   | GNAS  | HRAS  | IDH1    | IDH2   | JAK2   | JAK3  | KIT   | KRAS   |
| MAP2K1  | MAP2K2 | MDM2  | MET   | MLH1    | MSH2   | MSH6   | MTOR  | NRAS  | NRG1   |
| NTRK1   | NTRK2  | NTRK3 | PALB2 | PDGFRA  | PDGFRB | PIK3CA | PMS2  | POLD1 | POLE   |
| PTEN    | RAF1   | RB1   | RET   | ROS1    | SMO    | STK11  | TERT  | TP53  | TPMT   |
| UGT1A1  |        |       |       |         |        |        |       |       |        |

**Table S2.** The list of 65 cancer-related genes.

|       |       |      |      |        |        |         |      |       |       |
|-------|-------|------|------|--------|--------|---------|------|-------|-------|
| AKT1  | ALK   | APC  | ARAF | ARID1A | ATM    | BCL2L11 | BRAF | BRCA1 | BRCA2 |
| CCND1 | CD274 | CDK4 | CDK6 | CDKN2A | CTNNB1 | CYP2C19 | DDR2 | DPYD  | EGFR  |

|       |       |       |        |        |          |        |        |       |       |
|-------|-------|-------|--------|--------|----------|--------|--------|-------|-------|
| ERBB2 | ERBB3 | FBXW7 | FGF19  | FGFR1  | FGFR2    | FGFR3  | FLT3   | HRAS  | JAK2  |
| KDR   | KIT   | KRAS  | LRP1B  | MAP2K1 | MAP2K2   | MET    | MLH1   | MSH2  | MSH6  |
| MTOR  | NF1   | NRAS  | NTRK1  | NTRK2  | PDCD1LG2 | PDGFRA | PIK3CA | PMS2  | POLD1 |
| POLE  | PTEN  | RAF1  | RET    | ROS1   | SMAD4    | SMO    | SPTA1  | STK11 | TP53  |
| TPMT  | TSC1  | TSC2  | UGT1A1 | VEGFA  |          |        |        |       |       |
